# Supplementary material for: Electronic structure and ionization energies of palladium and platinum N-heterocyclic carbene complexes
Source: Royal Society of Chemistry journal article supplement (doi:10.1039/b418133f), 2005-01-01
Supplement: b418133f.pdf [file b418133f.pdf]

## Supplementary information

The graphs below contain the orbital compositions obtained from fragment calculations carried out on complexes **1a-c** and **2a-c**. Metal based orbitals are shown in red and yellow, ligand based orbitals are shown in blue and green. Orbitals contributing less than 1% are not stated in the output of a fragment calculation. Therefore, orbitals with no composition stated are accounted for in the contribution from “Other” orbitals. Plots on the left side of the page correspond to palladium, those on the right of the page to platinum

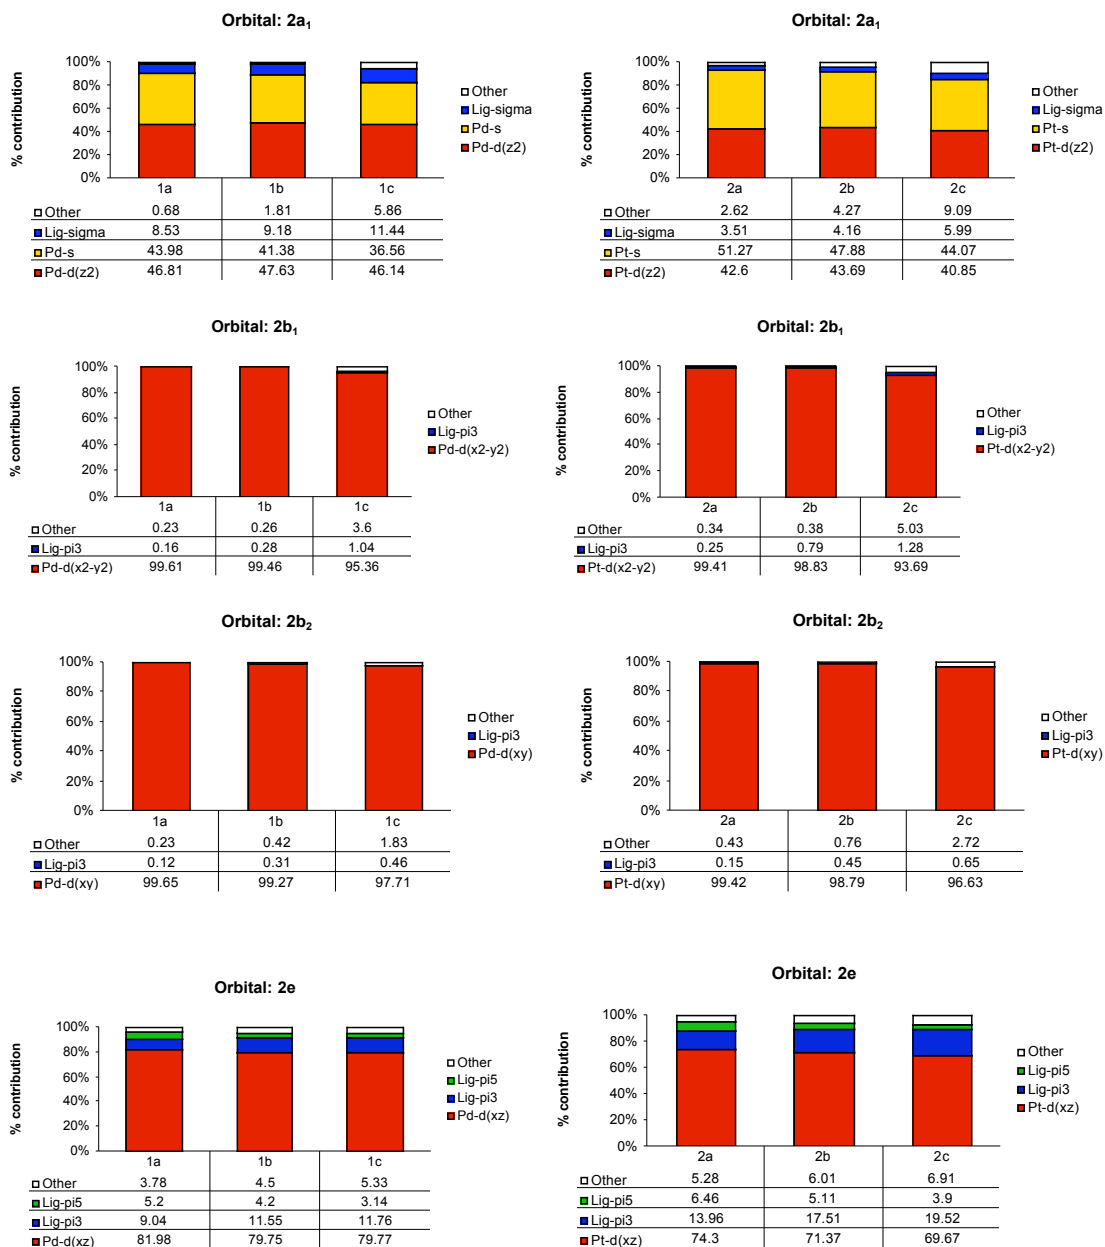

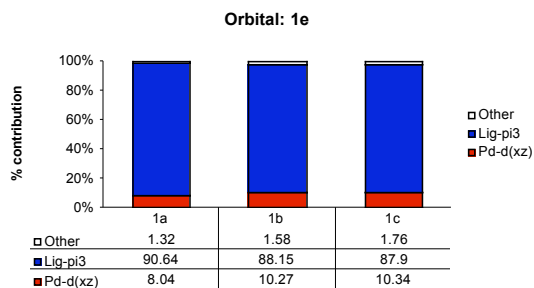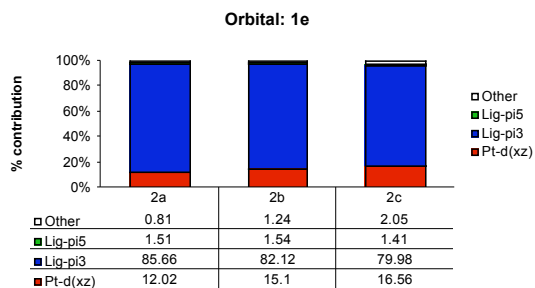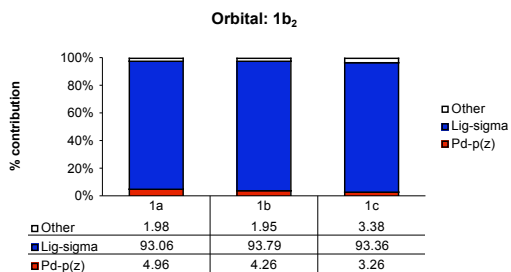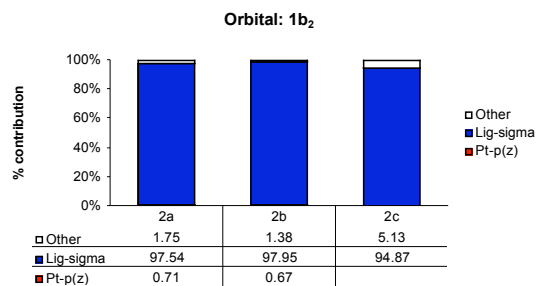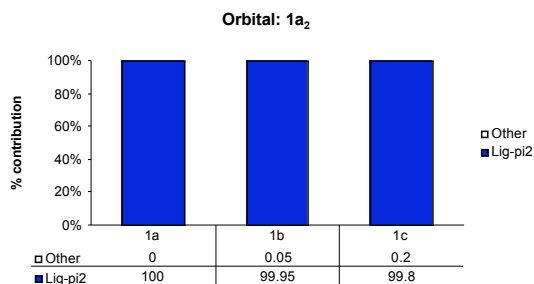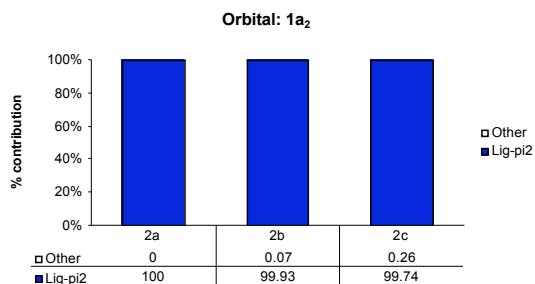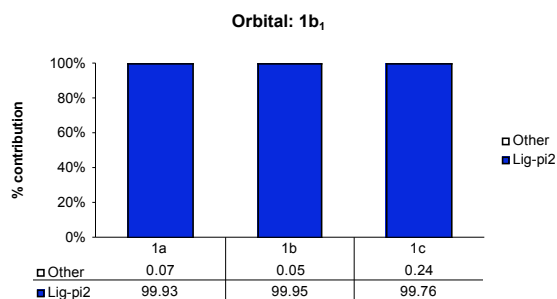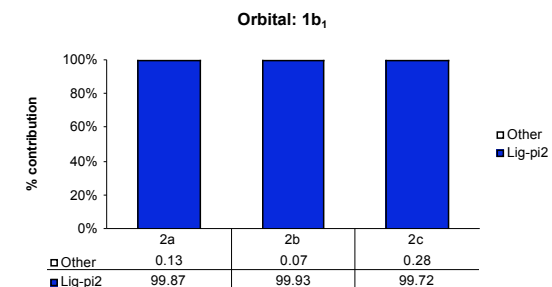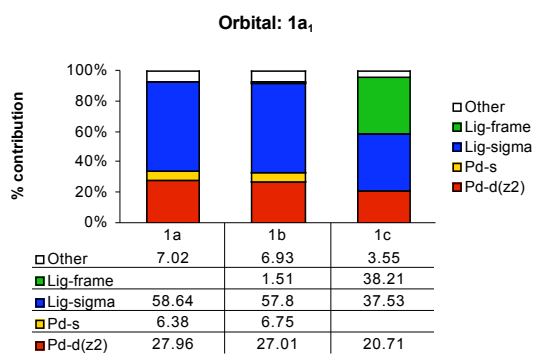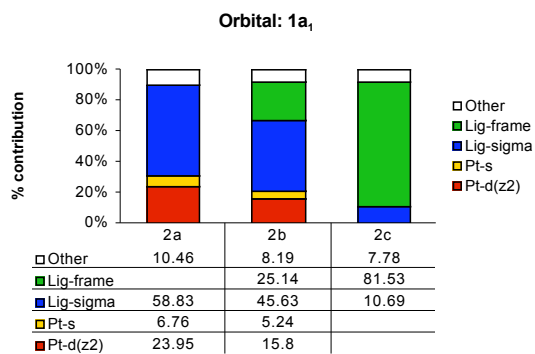

Orbital: 0a<sub>1</sub>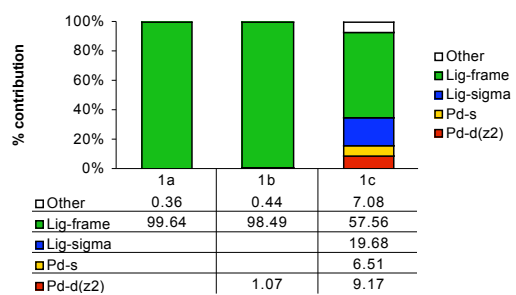Orbital: 0a<sub>1</sub>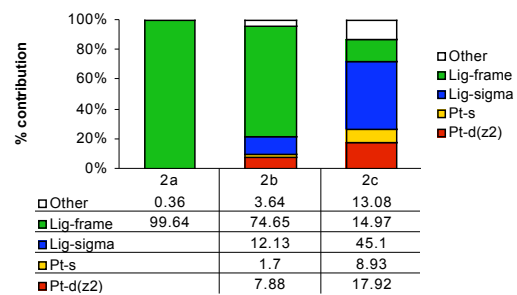

The tables below present the xyz coordinates optimised with gradient corrections applies both during and after SCF convergence.

**1a during**

```
C 0.481186 0.481186 -4.216267
N 0.751548 0.751548 -2.879426
C 0.000000 0.000000 -2.008285
N -0.751548 -0.751548 -2.879426
C -0.481186 -0.481186 -4.216267
H -0.980084 -0.980084 -5.036730
H 0.980084 0.980084 -5.036730
H -1.425072 -1.425072 -2.537693
H 1.425072 1.425072 -2.537693
C 0.481186 -0.481186 4.216267
N 0.751548 -0.751548 2.879426
C 0.000000 0.000000 2.008285
N -0.751548 0.751548 2.879426
C -0.481186 0.481186 4.216267
H -0.980084 0.980084 5.036730
H 0.980084 -0.980084 5.036730
H -1.425072 1.425072 2.537693
H 1.425072 -1.425072 2.537693
Pd 0.000000 0.000000 0.000000
```

**1a post**

```
C 0.478490 0.478490 -4.147166
N 0.744989 0.744989 -2.826321
C 0.000000 0.000000 -1.968618
N -0.744989 -0.744989 -2.826321
C -0.478490 -0.478490 -4.147166
H -0.976524 -0.976524 -4.973425
H 0.976524 0.976524 -4.973425
H -1.418642 -1.418642 -2.473700
H 1.418642 1.418642 -2.473700
C 0.478490 -0.478490 4.147166
N 0.744989 -0.744989 2.826321
C 0.000000 0.000000 1.968618
N -0.744989 0.744989 2.826321
C -0.478490 0.478490 4.147166
H -0.976524 0.976524 4.973425
H 0.976524 -0.976524 4.973425
H -1.418642 1.418642 2.473700
H 1.418642 -1.418642 2.473700
Pd 0.000000 0.000000 0.000000
```

**1b during**

31

C 0.481796 0.481796 -4.212772  
N 0.760384 0.760384 -2.880637  
C 0.000000 0.000000 -2.020372  
N -0.760384 -0.760384 -2.880637  
C -0.481796 -0.481796 -4.212772  
H -0.979779 -0.979779 -5.035418  
H 0.979779 0.979779 -5.035418  
C -1.739291 -1.739291 -2.419808  
C 1.739291 1.739291 -2.419808  
C 0.481796 -0.481796 4.212772  
N 0.760384 -0.760384 2.880637  
C 0.000000 0.000000 2.020372  
N -0.760384 0.760384 2.880637  
C -0.481796 0.481796 4.212772  
H -0.979779 0.979779 5.035418  
H 0.979779 -0.979779 5.035418  
C -1.739291 1.739291 2.419808  
C 1.739291 -1.739291 2.419808  
Pd 0.000000 0.000000 0.000000  
H 1.244303 2.500662 -1.805443  
H 2.500662 1.244303 -1.805443  
H 2.210309 2.210309 -3.290795  
H -1.244303 -2.500662 -1.805443  
H -2.500662 -1.244303 -1.805443  
H -2.210309 -2.210309 -3.290795  
H -2.210309 2.210309 3.290795  
H -1.244303 2.500662 1.805443  
H -2.500662 1.244303 1.805443  
H 2.210309 -2.210309 3.290795  
H 1.244303 -2.500662 1.805443  
H 2.500662 -1.244303 1.805443

**1b post 31**

C 0.479428 0.479428 -4.141338  
N 0.752261 0.752261 -2.824972  
C 0.000000 0.000000 -1.979430  
N -0.752261 -0.752261 -2.824972  
C -0.479428 -0.479428 -4.141338  
H -0.981154 -0.981154 -4.964448  
H 0.981154 0.981154 -4.964448  
C -1.711260 -1.711260 -2.355476  
C 1.711260 1.711260 -2.355476  
C 0.479428 -0.479428 4.141338

N 0.752261 -0.752261 2.824972  
C 0.000000 0.000000 1.979430  
N -0.752261 0.752261 2.824972  
C -0.479428 0.479428 4.141338  
H -0.981154 0.981154 4.964448  
H 0.981154 -0.981154 4.964448  
C -1.711260 1.711260 2.355476  
C 1.711260 -1.711260 2.355476  
Pd 0.000000 0.000000 0.000000  
H 1.209743 2.465128 -1.730287  
H 2.465128 1.209743 -1.730287  
H 2.194678 2.194678 -3.216794  
H -1.209743 -2.465128 -1.730287  
H -2.465128 -1.209743 -1.730287  
H -2.194678 -2.194678 -3.216794  
H -2.194678 2.194678 3.216794  
H -1.209743 2.465128 1.730287  
H -2.465128 1.209743 1.730287  
H 2.194678 -2.194678 3.216794  
H 1.209743 -2.465128 1.730287  
H 2.465128 -1.209743 1.730287

**1c** during

67

C 0.479819 0.479819 -4.265486  
N 0.766961 0.766961 -2.936783  
C 0.000000 0.000000 -2.071783  
N -0.766961 -0.766961 -2.936783  
C -0.479819 -0.479819 -4.265486  
H -0.961638 -0.961638 -5.103415  
H 0.961638 0.961638 -5.103415  
C -1.788196 -1.788196 -2.513867  
C 1.788196 1.788196 -2.513867  
C 0.479819 -0.479819 4.265486  
N 0.766961 -0.766961 2.936783  
C 0.000000 0.000000 2.071783  
N -0.766961 0.766961 2.936783  
C -0.479819 0.479819 4.265486  
H -0.961638 0.961638 5.103415  
H 0.961638 -0.961638 5.103415  
C -1.788196 1.788196 2.513867  
C 1.788196 -1.788196 2.513867  
Pd 0.000000 0.000000 0.000000  
C 1.086271 2.868634 -1.682711  
C 2.868634 1.086271 -1.682711  
C 2.430570 2.430570 -3.750542

C -1.086271 -2.868634 -1.682711  
C -2.868634 -1.086271 -1.682711  
C -2.430570 -2.430570 -3.750542  
C -2.430570 2.430570 3.750542  
C -1.086271 2.868634 1.682711  
C -2.868634 1.086271 1.682711  
C 2.430570 -2.430570 3.750542  
C 1.086271 -2.868634 1.682711  
C 2.868634 -1.086271 1.682711  
H 1.821319 3.605386 -1.326692  
H 0.321136 3.387296 -2.278634  
H 0.603017 2.389468 -0.816839  
H 3.167850 3.167850 -3.405330  
H 2.962003 1.694012 -4.370324  
H 1.694012 2.962003 -4.370324  
H 3.605386 1.821319 -1.326692  
H 2.389468 0.603017 -0.816839  
H 3.387296 0.321136 -2.278634  
H -0.321136 -3.387296 -2.278634  
H -0.603017 -2.389468 -0.816839  
H -1.821319 -3.605386 -1.326692  
H -3.167850 -3.167850 -3.405330  
H -2.962003 -1.694012 -4.370324  
H -1.694012 -2.962003 -4.370324  
H -3.387296 -0.321136 -2.278634  
H -3.605386 -1.821319 -1.326692  
H -2.389468 -0.603017 -0.816839  
H -0.321136 3.387296 2.278634  
H -0.603017 2.389468 0.816839  
H -1.821319 3.605386 1.326692  
H -3.605386 1.821319 1.326692  
H -2.389468 0.603017 0.816839  
H -3.387296 0.321136 2.278634  
H -1.694012 2.962003 4.370324  
H -3.167850 3.167850 3.405330  
H -2.962003 1.694012 4.370324  
H 3.387296 -0.321136 2.278634  
H 3.605386 -1.821319 1.326692  
H 2.389468 -0.603017 0.816839  
H 2.962003 -1.694012 4.370324  
H 1.694012 -2.962003 4.370324  
H 3.167850 -3.167850 3.405330  
H 1.821319 -3.605386 1.326692  
H 0.321136 -3.387296 2.278634  
H 0.603017 -2.389468 0.816839

C 0.478017 0.478017 -4.190562  
N 0.756205 0.756205 -2.876273  
C 0.000000 0.000000 -2.026918  
N -0.756205 -0.756205 -2.876273  
C -0.478017 -0.478017 -4.190562  
H -0.969701 -0.969701 -5.023169  
H 0.969701 0.969701 -5.023169  
C -1.751312 -1.751312 -2.437624  
C 1.751312 1.751312 -2.437624  
C 0.478017 -0.478017 4.190562  
N 0.756205 -0.756205 2.876273  
C 0.000000 0.000000 2.026918  
N -0.756205 0.756205 2.876273  
C -0.478017 0.478017 4.190562  
H -0.969701 0.969701 5.023169  
H 0.969701 -0.969701 5.023169  
C -1.751312 1.751312 2.437624  
C 1.751312 -1.751312 2.437624  
Pd 0.000000 0.000000 0.000000  
C 1.046165 2.794807 -1.605430  
C 2.794807 1.046165 -1.605430  
C 2.395548 2.395548 -3.640049  
C -1.046165 -2.794807 -1.605430  
C -2.794807 -1.046165 -1.605430  
C -2.395548 -2.395548 -3.640049  
C -2.395548 2.395548 3.640049  
C -1.046165 2.794807 1.605430  
C -2.794807 1.046165 1.605430  
C 2.395548 -2.395548 3.640049  
C 1.046165 -2.794807 1.605430  
C 2.794807 -1.046165 1.605430  
H 1.777212 3.512128 -1.198156  
H 0.295297 3.337686 -2.203752  
H 0.534534 2.271664 -0.770196  
H 3.131012 3.131012 -3.279499  
H 2.932189 1.659359 -4.261683  
H 1.659359 2.932189 -4.261683  
H 3.512128 1.777212 -1.198156  
H 2.271664 0.534534 -0.770196  
H 3.337686 0.295297 -2.203752  
H -0.295297 -3.337686 -2.203752  
H -0.534534 -2.271664 -0.770196  
H -1.777212 -3.512128 -1.198156  
H -3.131012 -3.131012 -3.279499  
H -2.932189 -1.659359 -4.261683  
H -1.659359 -2.932189 -4.261683  
H -3.337686 -0.295297 -2.203752  
H -3.512128 -1.777212 -1.198156



H -2.271664 -0.534534 -0.770196  
H -0.295297 3.337686 2.203752  
H -0.534534 2.271664 0.770196  
H -1.777212 3.512128 1.198156  
H -3.512128 1.777212 1.198156  
H -2.271664 0.534534 0.770196  
H -3.337686 0.295297 2.203752  
H -1.659359 2.932189 4.261683  
H -3.131012 3.131012 3.279499  
H -2.932189 1.659359 4.261683  
H 3.337686 -0.295297 2.203752  
H 3.512128 -1.777212 1.198156  
H 2.271664 -0.534534 0.770196  
H 2.932189 -1.659359 4.261683  
H 1.659359 -2.932189 4.261683  
H 3.131012 -3.131012 3.279499  
H 1.777212 -3.512128 1.198156  
H 0.295297 -3.337686 2.203752  
H 0.534534 -2.271664 0.770196

**2a during**

19

C 0.481126 0.481126 -4.186884  
N 0.754053 0.754053 -2.852291  
C 0.000000 0.000000 -1.981916  
N -0.754053 -0.754053 -2.852291  
C -0.481126 -0.481126 -4.186884  
H -0.979250 -0.979250 -5.008027  
H 0.979250 0.979250 -5.008027  
H -1.427085 -1.427085 -2.507669  
H 1.427085 1.427085 -2.507669  
C 0.481126 -0.481126 4.186884  
N 0.754053 -0.754053 2.852291  
C 0.000000 0.000000 1.981916  
N -0.754053 0.754053 2.852291  
C -0.481126 0.481126 4.186884  
H -0.979250 0.979250 5.008027  
H 0.979250 -0.979250 5.008027  
H -1.427085 1.427085 2.507669  
H 1.427085 -1.427085 2.507669  
Pt 0.000000 0.000000 0.000000

**2a post**

19

C 0.478424 0.478424 -4.128979  
N 0.747310 0.747310 -2.810178  
C 0.000000 0.000000 -1.952799  
N -0.747310 -0.747310 -2.810178  
C -0.478424 -0.478424 -4.128979  
H -0.975546 -0.975546 -4.956018  
H 0.975546 0.975546 -4.956018  
H -1.420409 -1.420409 -2.454133  
H 1.420409 1.420409 -2.454133  
C 0.478424 -0.478424 4.128979  
N 0.747310 -0.747310 2.810178  
C 0.000000 0.000000 1.952799  
N -0.747310 0.747310 2.810178  
C -0.478424 0.478424 4.128979  
H -0.975546 0.975546 4.956018  
H 0.975546 -0.975546 4.956018  
H -1.420409 1.420409 2.454133  
H 1.420409 -1.420409 2.454133  
Pt 0.000000 0.000000 0.000000

**2b during**

31

C 0.481705 0.481705 -4.184459  
N 0.762884 0.762884 -2.854433  
C 0.000000 0.000000 -1.994449  
N -0.762884 -0.762884 -2.854433  
C -0.481705 -0.481705 -4.184459  
H -0.979329 -0.979329 -5.007363  
H 0.979329 0.979329 -5.007363  
C -1.741300 -1.741300 -2.392613  
C 1.741300 1.741300 -2.392613  
C 0.481705 -0.481705 4.184459  
N 0.762884 -0.762884 2.854433  
C 0.000000 0.000000 1.994449  
N -0.762884 0.762884 2.854433  
C -0.481705 0.481705 4.184459  
H -0.979329 0.979329 5.007363  
H 0.979329 -0.979329 5.007363  
C -1.741300 1.741300 2.392613  
C 1.741300 -1.741300 2.392613  
Pt 0.000000 0.000000 0.000000  
H 1.246112 2.502126 -1.777720  
H 2.502126 1.246112 -1.777720  
H 2.211990 2.211990 -3.264103  
H -1.246112 -2.502126 -1.777720

H -2.502126 -1.246112 -1.777720  
H -2.211990 -2.211990 -3.264103  
H -2.211990 2.211990 3.264103  
H -1.246112 2.502126 1.777720  
H -2.502126 1.246112 1.777720  
H 2.211990 -2.211990 3.264103  
H 1.246112 -2.502126 1.777720  
H 2.502126 -1.246112 1.777720

## 2b post

31

C 0.479365 0.479365 -4.123351  
N 0.754535 0.754535 -2.808894  
C 0.000000 0.000000 -1.963529  
N -0.754535 -0.754535 -2.808894  
C -0.479365 -0.479365 -4.123351  
H -0.980523 -0.980523 -4.946807  
H 0.980523 0.980523 -4.946807  
C -1.712036 -1.712036 -2.334600  
C 1.712036 1.712036 -2.334600  
C 0.479365 -0.479365 4.123351  
N 0.754535 -0.754535 2.808894  
C 0.000000 0.000000 1.963529  
N -0.754535 0.754535 2.808894  
C -0.479365 0.479365 4.123351  
H -0.980523 0.980523 4.946807  
H 0.980523 -0.980523 4.946807  
C -1.712036 1.712036 2.334600  
C 1.712036 -1.712036 2.334600  
Pt 0.000000 0.000000 0.000000  
H 1.208676 2.463393 -1.707618  
H 2.463393 1.208676 -1.707618  
H 2.197338 2.197338 -3.193774  
H -1.208676 -2.463393 -1.707618  
H -2.463393 -1.208676 -1.707618  
H -2.197338 -2.197338 -3.193774  
H -2.197338 2.197338 3.193774  
H -1.208676 2.463393 1.707618  
H -2.463393 1.208676 1.707618  
H 2.197338 -2.197338 3.193774  
H 1.208676 -2.463393 1.707618  
H 2.463393 -1.208676 1.707618

**2c during**

67

C 0.479422 0.479422 -4.225980  
N 0.770635 0.770635 -2.900010  
C 0.000000 0.000000 -2.033738  
N -0.770635 -0.770635 -2.900010  
C -0.479422 -0.479422 -4.225980  
H -0.960199 -0.960199 -5.064657  
H 0.960199 0.960199 -5.064657  
C -1.795432 -1.795432 -2.489908  
C 1.795432 1.795432 -2.489908  
C 0.479422 -0.479422 4.225980  
N 0.770635 -0.770635 2.900010  
C 0.000000 0.000000 2.033738  
N -0.770635 0.770635 2.900010  
C -0.479422 0.479422 4.225980  
H -0.960199 0.960199 5.064657  
H 0.960199 -0.960199 5.064657  
C -1.795432 1.795432 2.489908  
C 1.795432 -1.795432 2.489908  
Pt 0.000000 0.000000 0.000000  
C 1.101477 2.884132 -1.662387  
C 2.884132 1.101477 -1.662387  
C 2.429704 2.429704 -3.735773  
C -1.101477 -2.884132 -1.662387  
C -2.884132 -1.101477 -1.662387  
C -2.429704 -2.429704 -3.735773  
C -2.429704 2.429704 3.735773  
C -1.101477 2.884132 1.662387  
C -2.884132 1.101477 1.662387  
C 2.429704 -2.429704 3.735773  
C 1.101477 -2.884132 1.662387  
C 2.884132 -1.101477 1.662387  
H 1.840818 3.624769 -1.323348  
H 0.329946 3.396775 -2.255387  
H 0.629574 2.411813 -0.786620  
H 3.168787 3.168787 -3.398397  
H 2.958390 1.690267 -4.354457  
H 1.690267 2.958390 -4.354457  
H 3.624769 1.840818 -1.323348  
H 2.411813 0.629574 -0.786620  
H 3.396775 0.329946 -2.255387  
H -0.329946 -3.396775 -2.255387  
H -0.629574 -2.411813 -0.786620  
H -1.840818 -3.624769 -1.323348  
H -3.168787 -3.168787 -3.398397

H -2.958390 -1.690267 -4.354457  
H -1.690267 -2.958390 -4.354457  
H -3.396775 -0.329946 -2.255387  
H -3.624769 -1.840818 -1.323348  
H -2.411813 -0.629574 -0.786620  
H -0.329946 3.396775 2.255387  
H -0.629574 2.411813 0.786620  
H -1.840818 3.624769 1.323348  
H -3.624769 1.840818 1.323348  
H -2.411813 0.629574 0.786620  
H -3.396775 0.329946 2.255387  
H -1.690267 2.958390 4.354457  
H -3.168787 3.168787 3.398397  
H -2.958390 1.690267 4.354457  
H 3.396775 -0.329946 2.255387  
H 3.624769 -1.840818 1.323348  
H 2.411813 -0.629574 0.786620  
H 2.958390 -1.690267 4.354457  
H 1.690267 -2.958390 4.354457  
H 3.168787 -3.168787 3.398397  
H 1.840818 -3.624769 1.323348  
H 0.329946 -3.396775 2.255387  
H 0.629574 -2.411813 0.786620

**2c post**

67

C 0.477655 0.477655 -4.166139  
N 0.759211 0.759211 -2.854190  
C 0.000000 0.000000 -2.003687  
N -0.759211 -0.759211 -2.854190  
C -0.477655 -0.477655 -4.166139  
H -0.968670 -0.968670 -4.999160  
H 0.968670 0.968670 -4.999160  
C -1.756597 -1.756597 -2.424969  
C 1.756597 1.756597 -2.424969  
C 0.477655 -0.477655 4.166139  
N 0.759211 -0.759211 2.854190  
C 0.000000 0.000000 2.003687  
N -0.759211 0.759211 2.854190  
C -0.477655 0.477655 4.166139  
H -0.968670 0.968670 4.999160  
H 0.968670 -0.968670 4.999160  
C -1.756597 1.756597 2.424969  
C 1.756597 -1.756597 2.424969  
Pt 0.000000 0.000000 0.000000

C 1.056593 2.806919 -1.596073  
C 2.806919 1.056593 -1.596073  
C 2.394576 2.394576 -3.634772  
C -1.056593 -2.806919 -1.596073  
C -2.806919 -1.056593 -1.596073  
C -2.394576 -2.394576 -3.634772  
C -2.394576 2.394576 3.634772  
C -1.056593 2.806919 1.596073  
C -2.806919 1.056593 1.596073  
C 2.394576 -2.394576 3.634772  
C 1.056593 -2.806919 1.596073  
C 2.806919 -1.056593 1.596073  
H 1.792318 3.521568 -1.192368  
H 0.309074 3.352390 -2.196473  
H 0.544140 2.287307 -0.758528  
H 3.131582 3.131582 -3.280144  
H 2.928898 1.655787 -4.255494  
H 1.655787 2.928898 -4.255494  
H 3.521568 1.792318 -1.192368  
H 2.287307 0.544140 -0.758528  
H 3.352390 0.309074 -2.196473  
H -0.309074 -3.352390 -2.196473  
H -0.544140 -2.287307 -0.758528  
H -1.792318 -3.521568 -1.192368  
H -3.131582 -3.131582 -3.280144  
H -2.928898 -1.655787 -4.255494  
H -1.655787 -2.928898 -4.255494  
H -3.352390 -0.309074 -2.196473  
H -3.521568 -1.792318 -1.192368  
H -2.287307 -0.544140 -0.758528  
H -0.309074 3.352390 2.196473  
H -0.544140 2.287307 0.758528  
H -1.792318 3.521568 1.192368  
H -3.521568 1.792318 1.192368  
H -2.287307 0.544140 0.758528  
H -3.352390 0.309074 2.196473  
H -1.655787 2.928898 4.255494  
H -3.131582 3.131582 3.280144  
H -2.928898 1.655787 4.255494  
H 3.352390 -0.309074 2.196473  
H 3.521568 -1.792318 1.192368  
H 2.287307 -0.544140 0.758528  
H 2.928898 -1.655787 4.255494  
H 1.655787 -2.928898 4.255494  
H 3.131582 -3.131582 3.280144  
H 1.792318 -3.521568 1.192368  
H 0.309074 -3.352390 2.196473  
H 0.544140 -2.287307 0.758528

**a during**

C 0.000000 0.680460 -4.165103  
N 0.000000 1.051166 -2.820825  
C 0.000000 0.000000 -1.939273  
N 0.000000 -1.051166 -2.820825  
C 0.000000 -0.680460 -4.165103  
H 0.000000 -1.386223 -4.986586  
H 0.000000 1.386223 -4.986586  
H 0.000000 -2.010458 -2.498028  
H 0.000000 2.010458 -2.498028

**a post**

9

C 0.000000 0.676348 -4.152802  
N 0.000000 1.040968 -2.824121  
C 0.000000 0.000000 -1.957565  
N 0.000000 -1.040968 -2.824121  
C 0.000000 -0.676348 -4.152802  
H 0.000000 -1.381905 -4.979179  
H 0.000000 1.381905 -4.979179  
H 0.000000 -2.002659 -2.497200  
H 0.000000 2.002659 -2.497200

**b during**

15

C 0.681328 0.000000 -4.157539  
N 1.063234 0.000000 -2.817672  
C 0.000000 0.000000 -1.950672  
N -1.063234 0.000000 -2.817672  
C -0.681328 0.000000 -4.157539  
H -1.385491 0.000000 -4.981507  
H 1.385491 0.000000 -4.981507  
C -2.448114 0.000000 -2.357117  
C 2.448114 0.000000 -2.357117  
H 2.641984 0.891151 -1.748869  
H 2.641984 -0.891151 -1.748869  
H 3.119831 0.000000 -3.222769  
H -2.641984 -0.891151 -1.748869  
H -2.641984 0.891151 -1.748869  
H -3.119831 0.000000 -3.222769

**b post**

15

C 0.677375 0.000000 -4.142024  
N 1.051457 0.000000 -2.817835  
C 0.000000 0.000000 -1.965365  
N -1.051457 0.000000 -2.817835  
C -0.677375 0.000000 -4.142024  
H -1.386953 0.000000 -4.966452  
H 1.386953 0.000000 -4.966452  
C -2.414222 0.000000 -2.364951  
C 2.414222 0.000000 -2.364951  
H 2.610442 0.891861 -1.752903  
H 2.610442 -0.891861 -1.752903  
H 3.089962 0.000000 -3.231480  
H -2.610442 -0.891861 -1.752903  
H -2.610442 0.891861 -1.752903  
H -3.089962 0.000000 -3.231480

**c during**

33

C 0.000000 0.681280 -4.271396  
N 0.000000 1.069004 -2.932039  
C 0.000000 0.000000 -2.074998  
N 0.000000 -1.069004 -2.932039  
C 0.000000 -0.681280 -4.271396  
H 0.000000 -1.368102 -5.107653  
H 0.000000 1.368102 -5.107653  
C 0.000000 -2.474733 -2.421053  
C 0.000000 2.474733 -2.421053  
C -1.260863 2.671724 -1.565042  
C 1.260863 2.671724 -1.565042  
C 0.000000 3.462850 -3.592684  
C 1.260863 -2.671724 -1.565042  
C -1.260863 -2.671724 -1.565042  
C 0.000000 -3.462850 -3.592684  
H -1.270712 3.682605 -1.131386  
H -2.167198 2.541777 -2.174044  
H -1.276434 1.928914 -0.757728  
H 0.000000 4.485934 -3.193074  
H 0.894664 3.349174 -4.221354  
H -0.894664 3.349174 -4.221354  
H 1.270712 3.682605 -1.131386  
H 1.276434 1.928914 -0.757728



H 2.167198 2.541777 -2.174044  
H 2.167198 -2.541777 -2.174044  
H 1.276434 -1.928914 -0.757728  
H 1.270712 -3.682605 -1.131386  
H 0.000000 -4.485934 -3.193074  
H -0.894664 -3.349174 -4.221354  
H 0.894664 -3.349174 -4.221354  
H -2.167198 -2.541777 -2.174044  
H -1.270712 -3.682605 -1.131386  
H -1.276434 -1.928914 -0.757728

**c post**

67

C 0.477655 0.477655 -4.166139  
N 0.759211 0.759211 -2.854190  
C 0.000000 0.000000 -2.003687  
N -0.759211 -0.759211 -2.854190  
C -0.477655 -0.477655 -4.166139  
H -0.968670 -0.968670 -4.999160  
H 0.968670 0.968670 -4.999160  
C -1.756597 -1.756597 -2.424969  
C 1.756597 1.756597 -2.424969  
C 0.477655 -0.477655 4.166139  
N 0.759211 -0.759211 2.854190  
C 0.000000 0.000000 2.003687  
N -0.759211 0.759211 2.854190  
C -0.477655 0.477655 4.166139  
H -0.968670 0.968670 4.999160  
H 0.968670 -0.968670 4.999160  
C -1.756597 1.756597 2.424969  
C 1.756597 -1.756597 2.424969  
Pt 0.000000 0.000000 0.000000  
C 1.056593 2.806919 -1.596073  
C 2.806919 1.056593 -1.596073  
C 2.394576 2.394576 -3.634772  
C -1.056593 -2.806919 -1.596073  
C -2.806919 -1.056593 -1.596073  
C -2.394576 -2.394576 -3.634772  
C -2.394576 2.394576 3.634772  
C -1.056593 2.806919 1.596073  
C -2.806919 1.056593 1.596073  
C 2.394576 -2.394576 3.634772  
C 1.056593 -2.806919 1.596073  
C 2.806919 -1.056593 1.596073  
H 1.792318 3.521568 -1.192368

H 0.309074 3.352390 -2.196473  
H 0.544140 2.287307 -0.758528  
H 3.131582 3.131582 -3.280144  
H 2.928898 1.655787 -4.255494  
H 1.655787 2.928898 -4.255494  
H 3.521568 1.792318 -1.192368  
H 2.287307 0.544140 -0.758528  
H 3.352390 0.309074 -2.196473  
H -0.309074 -3.352390 -2.196473  
H -0.544140 -2.287307 -0.758528  
H -1.792318 -3.521568 -1.192368  
H -3.131582 -3.131582 -3.280144  
H -2.928898 -1.655787 -4.255494  
H -1.655787 -2.928898 -4.255494  
H -3.352390 -0.309074 -2.196473  
H -3.521568 -1.792318 -1.192368  
H -2.287307 -0.544140 -0.758528  
H -0.309074 3.352390 2.196473  
H -0.544140 2.287307 0.758528  
H -1.792318 3.521568 1.192368  
H -3.521568 1.792318 1.192368  
H -2.287307 0.544140 0.758528  
H -3.352390 0.309074 2.196473  
H -1.655787 2.928898 4.255494  
H -3.131582 3.131582 3.280144  
H -2.928898 1.655787 4.255494  
H 3.352390 -0.309074 2.196473  
H 3.521568 -1.792318 1.192368  
H 2.287307 -0.544140 0.758528  
H 2.928898 -1.655787 4.255494  
H 1.655787 -2.928898 4.255494  
H 3.131582 -3.131582 3.280144  
H 1.792318 -3.521568 1.192368  
H 0.309074 -3.352390 2.196473  
H 0.544140 -2.287307 0.758528
